# Supplementary material for: [Al(H2O)6](IO3)2(NO3): a material with enhanced birefringence induced by synergism of two superior functional motifs
Source: Royal Society of Chemistry journal article supplement (doi:10.1039/d0cc04813e), 2020-01-01
Supplement: d0cc04813e1.pdf [file d0cc04813e1.pdf]

## **[Al(H<sub>2</sub>O)<sub>6</sub>](IO<sub>3</sub>)<sub>2</sub>(NO<sub>3</sub>): A Material with Sizable Birefringence Induced by Synergism of Double Superior Functional Motifs**

Zhiyong Bai,<sup>[a][c]</sup> Chun-Li Hu,<sup>[b]</sup> Dongmei Wang,<sup>[a]</sup> Lehui Liu,<sup>[a]</sup> Lizhen Zhang,<sup>[a][d]</sup> Feifei Yuan,<sup>[a]</sup> Yisheng Huang,<sup>[a]</sup> and Zhubin Lin\*<sup>[a][d]</sup>

---

*[a] Key Laboratory of Optoelectronic Materials Chemistry and Physics, Fujian Institute of Research on the Structure of Matter, Chinese Academy of Sciences, Fuzhou, Fujian, 350002, P. R. China. E-mail: lzb@fjirsm.ac.cn*

*[b] State Key Laboratory of Structural Chemistry, Fujian Institute of Research on the Structure of Matter, Chinese Academy of Sciences, Fuzhou, Fujian, 350002, P. R. China.*

*[c] University of Chinese Academy of Sciences, Beijing 100049, P. R. China.*

*[d] Fujian Science & Technology Innovation Laboratory for Optoelectronic Information of China, Fuzhou, Fujian, 350108, China*

## Experiment

- Synthesis.** The chemical reagent  $\text{Al}(\text{NO}_3)_3 \cdot 9\text{H}_2\text{O}$  (3 mmol, 1.1250g) and  $\text{I}_2\text{O}_5$  (3 mmol, 1.0014g) were dissolved in the 5 mL distilled water and then stirred to ensure solution dissolves clearly. The solution was evaporated at room temperature and after about four days large transparent single crystal with dimensions of  $12 \times 8 \times 5 \text{ mm}^3$  was obtained (Figure S4).
- Powder X-ray Diffraction.** Powder X-ray diffraction analyses of AINO were carried out at room temperature on a Miniflex 600 diffractometer equipped with  $\text{Cu K}\alpha$  radiation ( $\lambda = 1.5406 \text{ \AA}$ ). Data were collected in the angular range of  $2\theta = 10\text{-}70^\circ$  with a scan step width of  $0.008^\circ$  and a scan time of 0.5 s. The experimental powder X-ray diffraction patterns are in agreement with those simulation results on the basis of the single-crystal crystallographic data.
- Single Crystal X-ray Diffraction.** The single crystal X-ray diffraction was performed on a Rigaku ROD, Synergy Custom system, HyPix diffractometer equipped with mirror-monochromatic  $\text{Ga K}\alpha$  radiation ( $\lambda=1.3405\text{\AA}$ ) at 298 K. A suitable sample of AINO was selected and used for data collection. The data were corrected for Lorentz factor, polarization and absorption. By means of Olex2, the structure was solved with the ShelXT structure solution program using Intrinsic Phasing and refined with the ShelXL refinement package using Least Squares minimization. All of the atoms were refined with anisotropic displacement parameters and secondary extinction correction. The structure was verified by Platon and no higher symmetry was found. Crystallographic data for structural refinements, atoms coordination, thermal parameters, and selected bond lengths and bond angles are listed in Tables S1 to S8.
- Birefringence Measurement.** The birefringence of AINO was measured on a polarizing microscope (ZEISS Axio Scope. A1) equipped with Berek compensator. The wavelength of the light source is 546 nm. Attributable to the clear boundary lines of the first-, second- and third-order interference color, the relative error is small enough. During the measurement, the retardation was recorded and then the crystal's thickness was measured. According to the given retardation and thickness of crystal, the birefringence was calculated with following equation,
$$\Delta n=R/d \quad (1)$$
where,  $\Delta n$  represents the birefringence,  $R$  the retardation, and  $d$  the thickness of the crystal selected as measurement sample.
- Transmittance Spectrum.** The UV-Vis-NIR transmittance spectrum of AINO were recorded at room temperature in a Perkin-Elmer Lambda 900 UV/Vis/NIR spectrophotometer in the 200-1000 nm wavelength range.
- Thermal Analysis.** Thermogravimetric (TG) analysis of AINO was performed on a NETZSCH STA 449F3 instrument in a temperature range of 30-1000  $^\circ\text{C}$  at a 10  $^\circ\text{C}$  /min heating rate.
- Computational Details.** Single-crystal structural data of compound AINO were used for the theoretical calculations. The electronic structures and optical properties were performed using a plane-wave basis set and pseudo-potentials within density functional theory (DFT) implemented

in the total-energy code CASTEP. For the exchange and correlation function, Perdew–Burke–Ernzerhof (PBE) in the generalized gradient approximation (GGA) was chosen. The interactions between the ionic cores and the electrons were described by the norm-conserving pseudopotential. The following valence-electron configurations were considered in the computation: Al-3s<sup>2</sup>3p<sup>1</sup>, I-5s<sup>2</sup>5p<sup>3</sup>, N-2s<sup>2</sup>2p<sup>3</sup>, O-2s<sup>2</sup>2p<sup>4</sup> and H-1s<sup>1</sup>. The number of plane waves included in the basis sets was determined by a cutoff energy of 900 eV. The numerical integration of the Brillouin zone was performed using a Monkhorst-Pack k-point sampling of 4 × 3 × 5. It's worth noting that 120 empty bands were included during the optical properties calculations to ensure the accuracy of refractive indices. The other parameters and convergent criteria were the default values of CASTEP code.

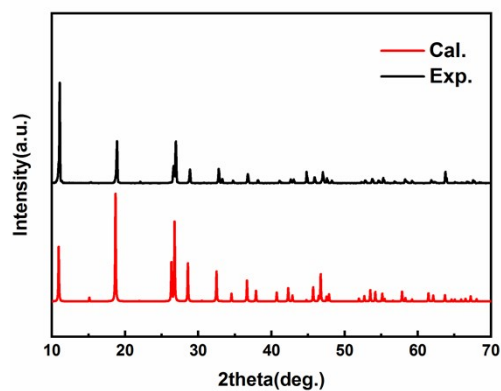

**Figure S1.** Powder X-ray diffraction patterns for AlNO

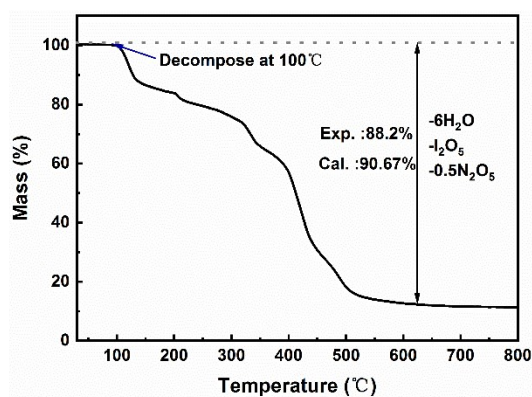

**Figure S2.** Thermogravimetric analysis (TGA) for AlNO

As shown in figure S2, AlNO started a decomposition and mass loss at about 100°C, and completed the decomposition at about and 500 °C with releasing of 6H<sub>2</sub>O, I<sub>2</sub>O<sub>5</sub>, and 0.5N<sub>2</sub>O<sub>5</sub>. The experimental mass loss is 88.2%, in accordance with the theoretical value 90.67%.

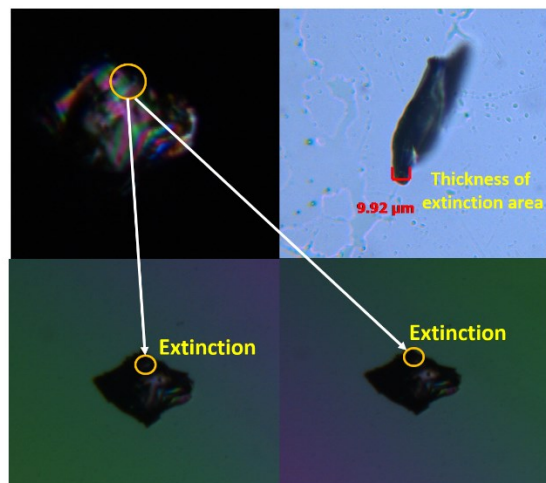

Figure S3. The photographs of extinction and thickness of crystal.

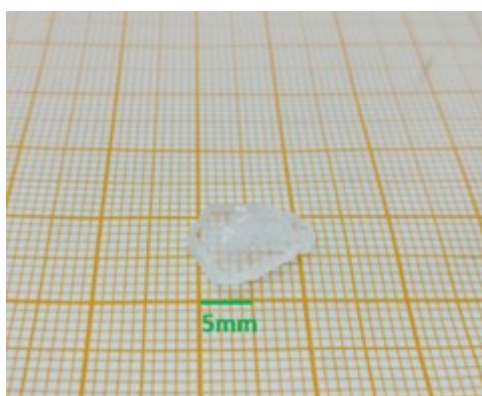

Figure S4. The as-grown single crystal of AINO with dimensions of  $12 \times 8 \times 5 \text{ mm}^3$ .

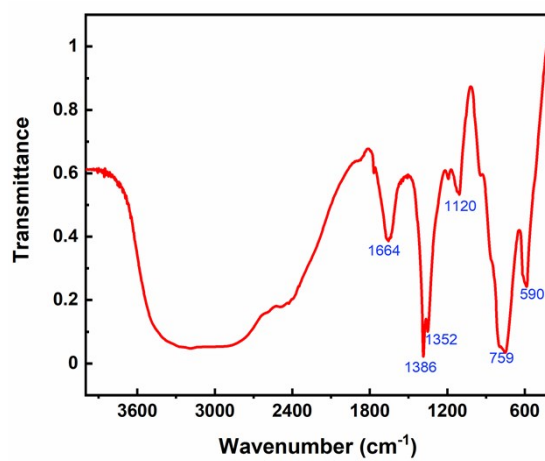

Figure S5. IR spectrums.

**Table S1.** Crystal data and structure refinement for AlNO.

|                                                       |                                                          |
|-------------------------------------------------------|----------------------------------------------------------|
| Empirical formula                                     | AlH <sub>12</sub> I <sub>2</sub> NO <sub>15</sub>        |
| Formula weight                                        | 546.91                                                   |
| Temperature/K                                         | 293(2)                                                   |
| Crystal system                                        | trigonal                                                 |
| Space group                                           | <i>P</i> -3 <i>m</i> 1                                   |
| <i>a</i> /Å                                           | 6.7200(7)                                                |
| <i>b</i> /Å                                           | 6.7200(7)                                                |
| <i>c</i> /Å                                           | 8.0975(10)                                               |
| $\alpha$ /°                                           | 90                                                       |
| $\beta$ /°                                            | 90                                                       |
| $\gamma$ /°                                           | 120                                                      |
| Volume/Å <sup>3</sup>                                 | 316.68(8)                                                |
| Z                                                     | 1                                                        |
| $\rho$ calcg/cm <sup>3</sup>                          | 2.868                                                    |
| $\mu$ /mm <sup>-1</sup>                               | 5.117                                                    |
| F(000)                                                | 258.0                                                    |
| Radiation                                             | MoK $\alpha$ ( $\lambda$ = 0.71073)                      |
| 2 $\theta$ range for data collection/°                | 7.002 to 54.904                                          |
| Index ranges                                          | -8 ≤ <i>h</i> ≤ 8, -8 ≤ <i>k</i> ≤ 8, -9 ≤ <i>l</i> ≤ 10 |
| Reflections collected                                 | 2383                                                     |
| Independent reflections                               | 307 [Rint = 0.0337, Rsigma = 0.0204]                     |
| Data/restraints/parameters                            | 307/0/27                                                 |
| Goodness-of-fit on F <sup>2</sup>                     | 1.305                                                    |
| Final R indexes [ <i>I</i> ≥ 2 $\sigma$ ( <i>I</i> )] | R1 = 0.0160, wR2 = 0.0437                                |
| Final R indexes [all data]                            | R1 = 0.0162, wR2 = 0.0438                                |
| Largest diff. peak/hole / e Å <sup>-3</sup>           | 0.44/-0.69                                               |

**Table S2.** Fractional Atomic Coordinates ( $\times 10^4$ ) and Equivalent Isotropic Displacement Parameters ( $\text{\AA}^2 \times 10^3$ ) for AlNO. U<sub>eq</sub> is defined as 1/3 of the trace of the orthogonalised U<sub>ij</sub> tensor.

| Atom                   | x       | y       | z         | U(eq)    |
|------------------------|---------|---------|-----------|----------|
| I001                   | 3333.33 | 6666.67 | 1101.5(4) | 16.5(2)  |
| O003                   | 4692(2) | 5308(2) | 2151(3)   | 28.4(6)  |
| Al02                   | 0       | 0       | 5000      | 15.0(5)  |
| O004                   | 2704(4) | 1352(2) | 3726(3)   | 23.5(6)  |
| N009                   | 0       | 0       | 0         | 23.5(17) |
| O00A                   | 1867(8) | 0       | 0         | 33.3(13) |
| Bond valence sum (BVS) |         | I: 5.2  | Al: 3.2   | N: 4.84  |

**Table S3.** Anisotropic Displacement Parameters ( $\text{\AA}^2 \times 10^3$ ) for AlNO. The Anisotropic displacement factor exponent takes the form:  $2\pi^2[h^2a^2U_{11} + 2hka^*b^*U_{12} + \dots]$ .

| Atom | U11      | U22      | U33      | U23    | U13     | U12      |
|------|----------|----------|----------|--------|---------|----------|
| I001 | 15.6(2)  | 15.6(2)  | 18.2(3)  | 0      | 0       | 7.79(11) |
| O003 | 26.7(10) | 26.7(10) | 37.5(16) | 3.9(6) | -3.9(6) | 17.6(12) |
| Al02 | 15.4(7)  | 15.4(7)  | 14.1(12) | 0      | 0       | 7.7(4)   |
| O004 | 27.3(14) | 23.1(9)  | 21.3(13) | 4.3(5) | 8.5(11) | 13.7(7)  |
| N009 | 29(3)    | 29(3)    | 12(4)    | 0      | 0       | 14.7(13) |
| O00A | 29(2)    | 40(3)    | 35(3)    | 3(3)   | 1.4(13) | 20.0(15) |

**Table S4.** Bond Lengths for AlNO.

| Atom | Atom  | Length/\AA | Atom | Atom   | Length/\AA |
|------|-------|------------|------|--------|------------|
| I001 | O0031 | 1.796(3)   | N009 | O00A8  | 1.255(5)   |
| I001 | O0032 | 1.796(3)   | N009 | O00A7  | 1.255(5)   |
| I001 | O003  | 1.796(3)   | N009 | O00A9  | 1.255(5)   |
| Al02 | O0043 | 1.882(2)   | N009 | O00A   | 1.255(5)   |
| Al02 | O0044 | 1.882(2)   | N009 | O00A10 | 1.255(5)   |
| Al02 | O0045 | 1.882(2)   | N009 | O00A4  | 1.255(5)   |
| Al02 | O0046 | 1.882(2)   | O00A | O00A10 | 1.255(5)   |
| Al02 | O0047 | 1.882(2)   | O00A | O00A8  | 1.255(5)   |
| Al02 | O004  | 1.882(2)   |      |        |            |

11-Y,1+X-Y,+Z; 2+Y-X,1-X,+Z; 3-X,-Y,1-Z; 4+Y-X,-X,+Z; 5+Y,-X+Y,1-Z; 6-Y+X,  
+X,1-Z; 7-Y,+X-Y,+Z; 8-Y+X,+X,-Z; 9-X,-Y,-Z; 10+Y,-X+Y,-Z

**Table S5.** Bond Angles for AlNO.

| Atom  | Atom | Atom  | Angle/°    | Atom   | Atom | Atom   | Angle/°  |
|-------|------|-------|------------|--------|------|--------|----------|
| O0031 | I001 | O0032 | 99.43(12)  | O00A8  | N009 | O00A7  | 180.0(8) |
| O0031 | I001 | O003  | 99.43(12)  | O00A7  | N009 | O00A6  | 120.0    |
| O0032 | I001 | O003  | 99.43(12)  | O00A8  | N009 | O00A9  | 120.0    |
| O0043 | Al02 | O004  | 87.19(11)  | O00A6  | N009 | O00A9  | 180.0    |
| O0044 | Al02 | O0045 | 92.81(11)  | O00A10 | N009 | O00A6  | 60.0     |
| O0044 | Al02 | O0046 | 180.00(12) | O00A6  | N009 | O00A   | 120.0    |
| O0044 | Al02 | O004  | 87.19(11)  | O00A8  | N009 | O00A6  | 60.0     |
| O0046 | Al02 | O0045 | 87.19(11)  | O00A8  | N009 | O00A10 | 120.0    |
| O0043 | Al02 | O0044 | 92.81(11)  | O00A10 | N009 | O00A   | 180.0    |
| O0047 | Al02 | O0045 | 87.19(11)  | O00A7  | N009 | O00A   | 120.0    |
| O0047 | Al02 | O0044 | 87.19(11)  | O00A9  | N009 | O00A   | 60.0     |
| O0046 | Al02 | O004  | 92.81(11)  | O00A7  | N009 | O00A10 | 60.0     |
| O0043 | Al02 | O0046 | 87.19(11)  | O00A10 | N009 | O00A9  | 120.0    |
| O0047 | Al02 | O004  | 92.81(11)  | O00A7  | N009 | O00A9  | 60.0     |
| O0047 | Al02 | O0046 | 92.81(11)  | O00A8  | N009 | O00A   | 60.0     |
| O0043 | Al02 | O0047 | 180.00(13) | O00A8  | O00A | N009   | 60.0     |
| O0043 | Al02 | O0045 | 92.81(11)  | O00A9  | O00A | N009   | 60.0     |
| O0045 | Al02 | O004  | 180.0      | O00A9  | O00A | O00A8  | 120.0    |

11-Y,1+X-Y,+Z; 2+Y-X,1-X,+Z; 3-Y+X,+X,1-Z; 4+Y,-X+Y,1-Z; 5-X,-Y,1-Z; 6-Y,+X-Y,+Z; 7+Y-X,-X,+Z; 8-Y+X,+X,-Z; 9+Y,-X+Y,-Z; 10-X,-Y,-Z

**Table S6.** Hydrogen Atom Coordinates ( $\text{\AA}\times 10^4$ ) and Isotropic Displacement Parameters ( $\text{\AA}^2\times 10^3$ ) for AlNO.

| Atom | x       | y       | z       | U(eq) |
|------|---------|---------|---------|-------|
| H00A | 2994.27 | 2673.18 | 3370    | 35    |
| H00B | 2488.8  | 561.08  | 2837.94 | 35    |

**Table S7.** Atomic Occupancy for AlNO.

| Atom | Occupancy | Atom | Occupancy | Atom | Occupancy |
|------|-----------|------|-----------|------|-----------|
| H00A | 0.5       | H00B | 0.5       | O00A | 0.5       |
